# Supplementary material
Source: publisher figshare collection journal article supplement (https://springernature.figshare.com/ndownloader/files/27600728)

Species and Hybrid Phenotypes

- C. aurita
- C. geoffroyi
- C. jacchus
- C. kuhlii
- C. penicillata
- C. penicillata x C. geoffroyi
- C. aurita x Callithrix sp.
- C. penicillata x C. jacchus
- Callithrix sp. x Callithrix sp.

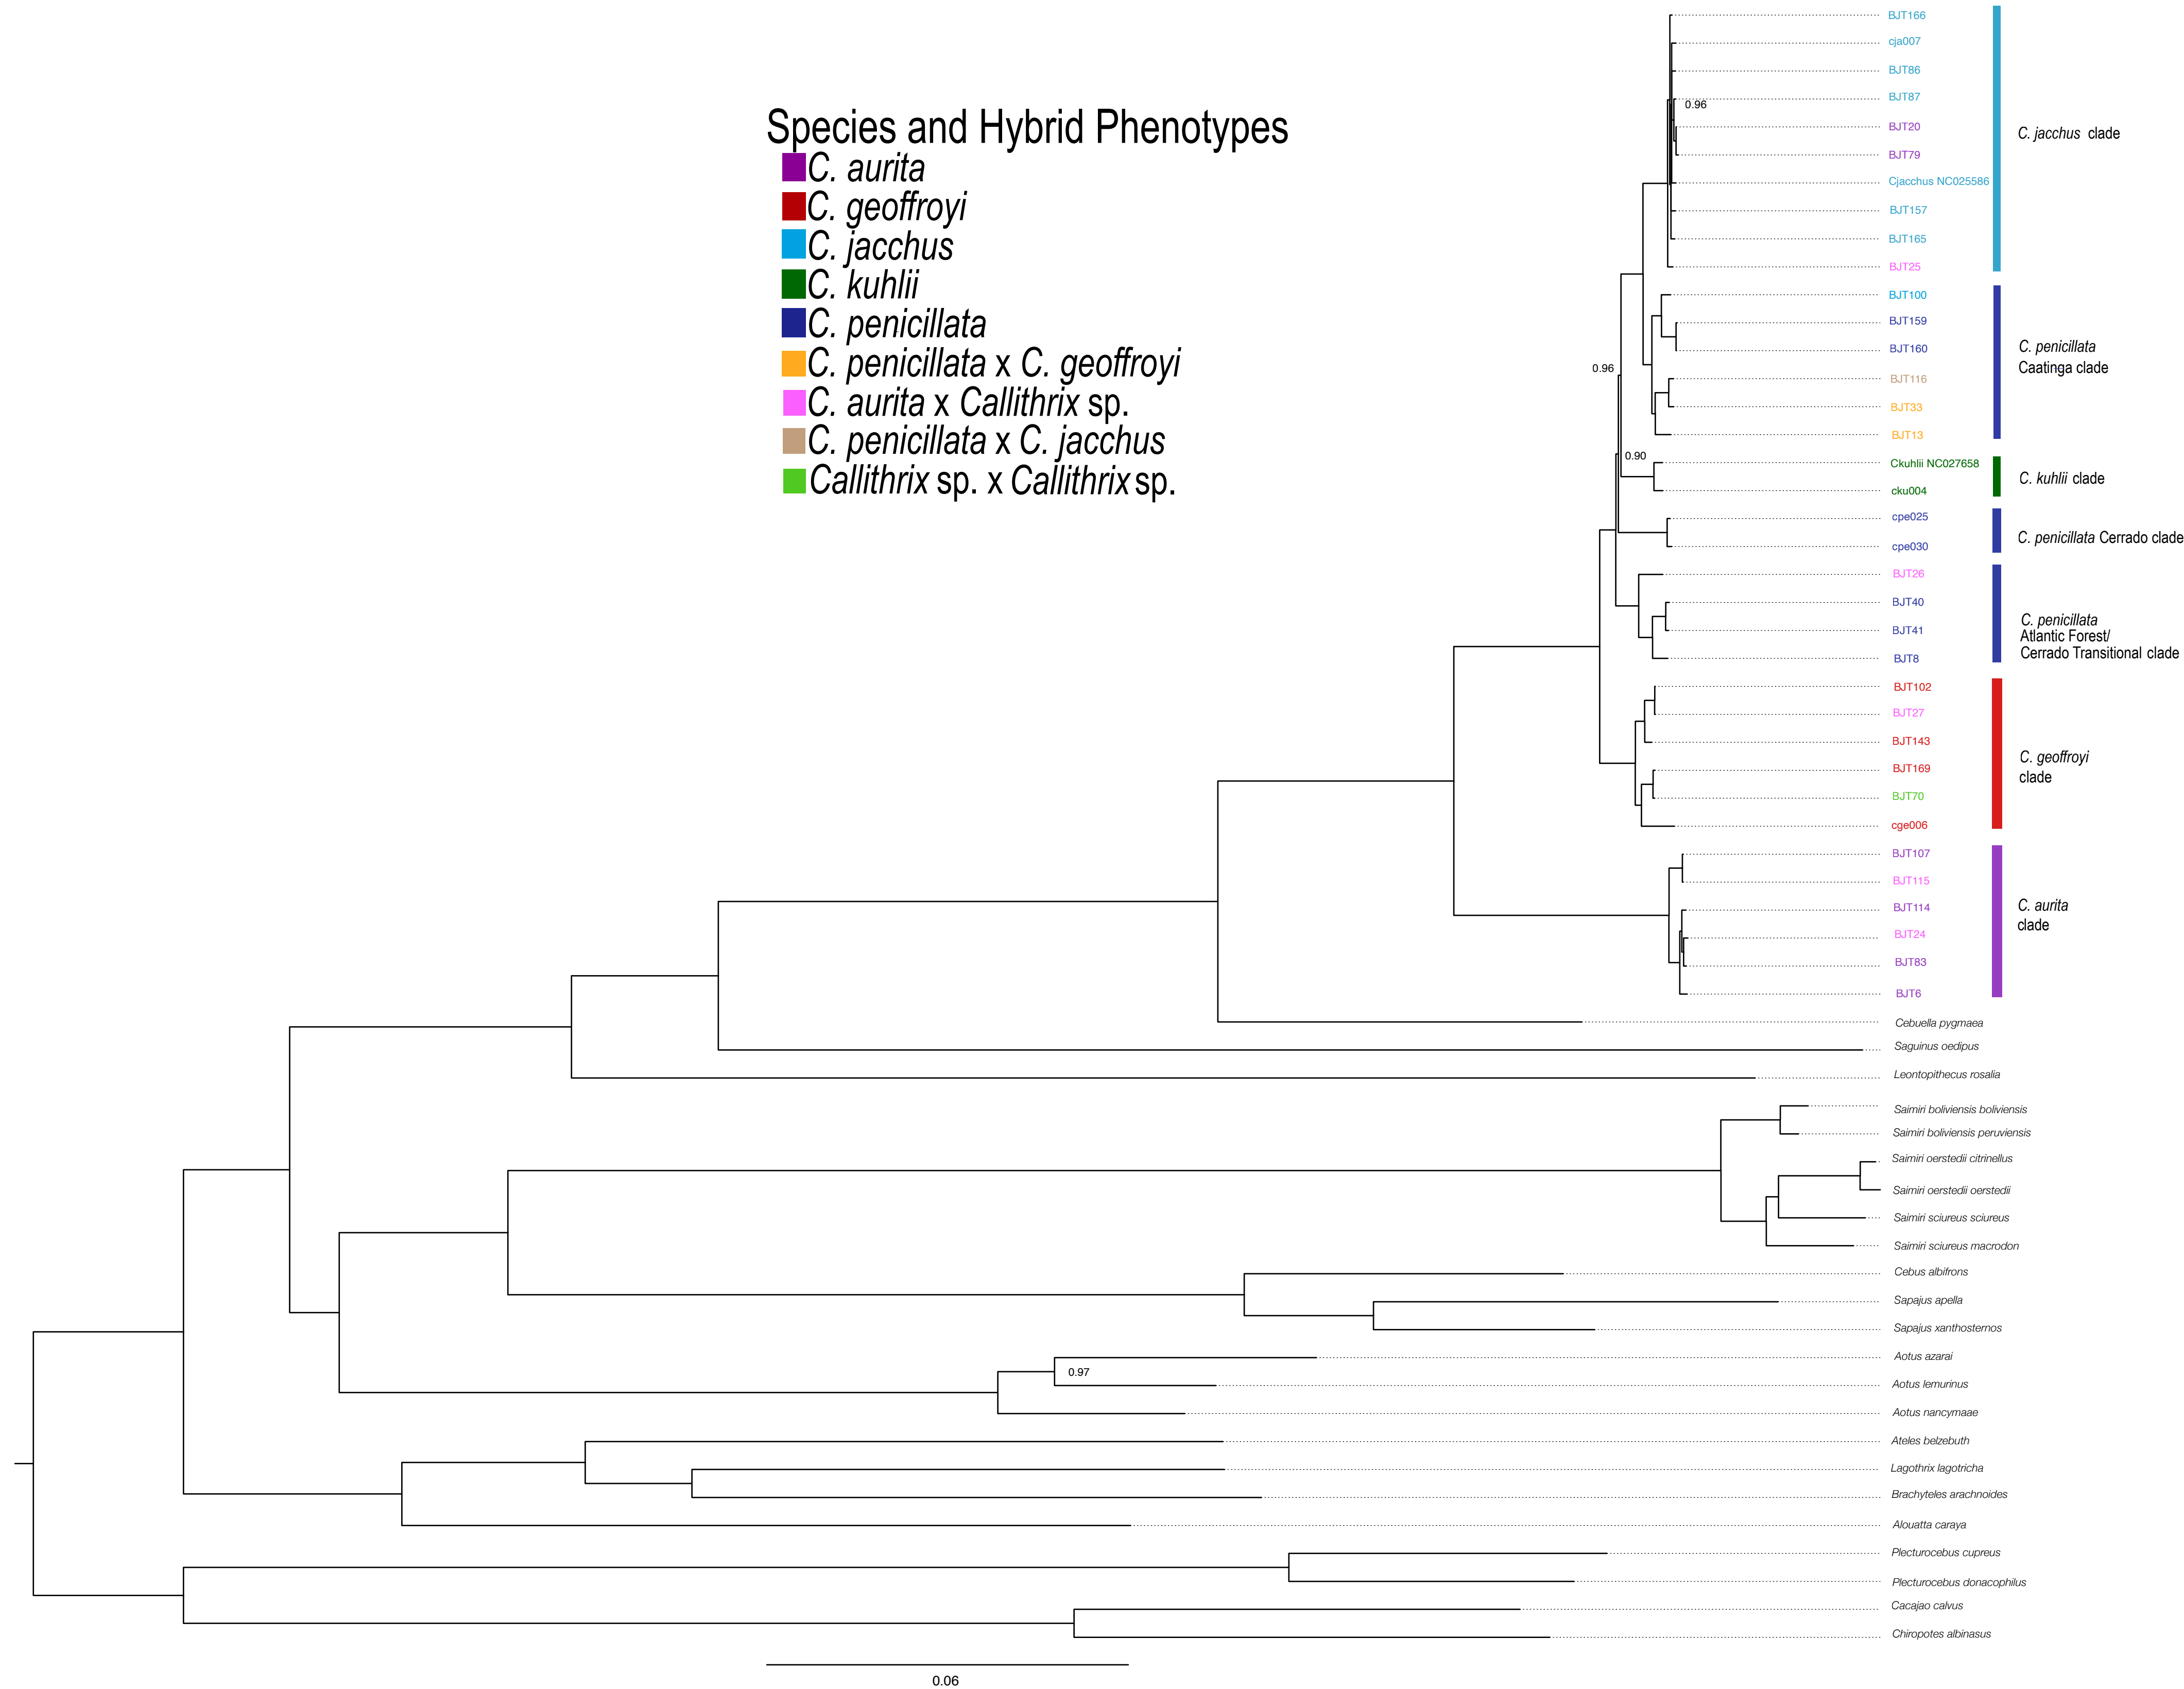

Supplement: Supplementary file 2 [file 27600728]
