# Supplementary material
Source: publisher figshare collection journal article supplement (https://springernature.figshare.com/ndownloader/files/27600728)

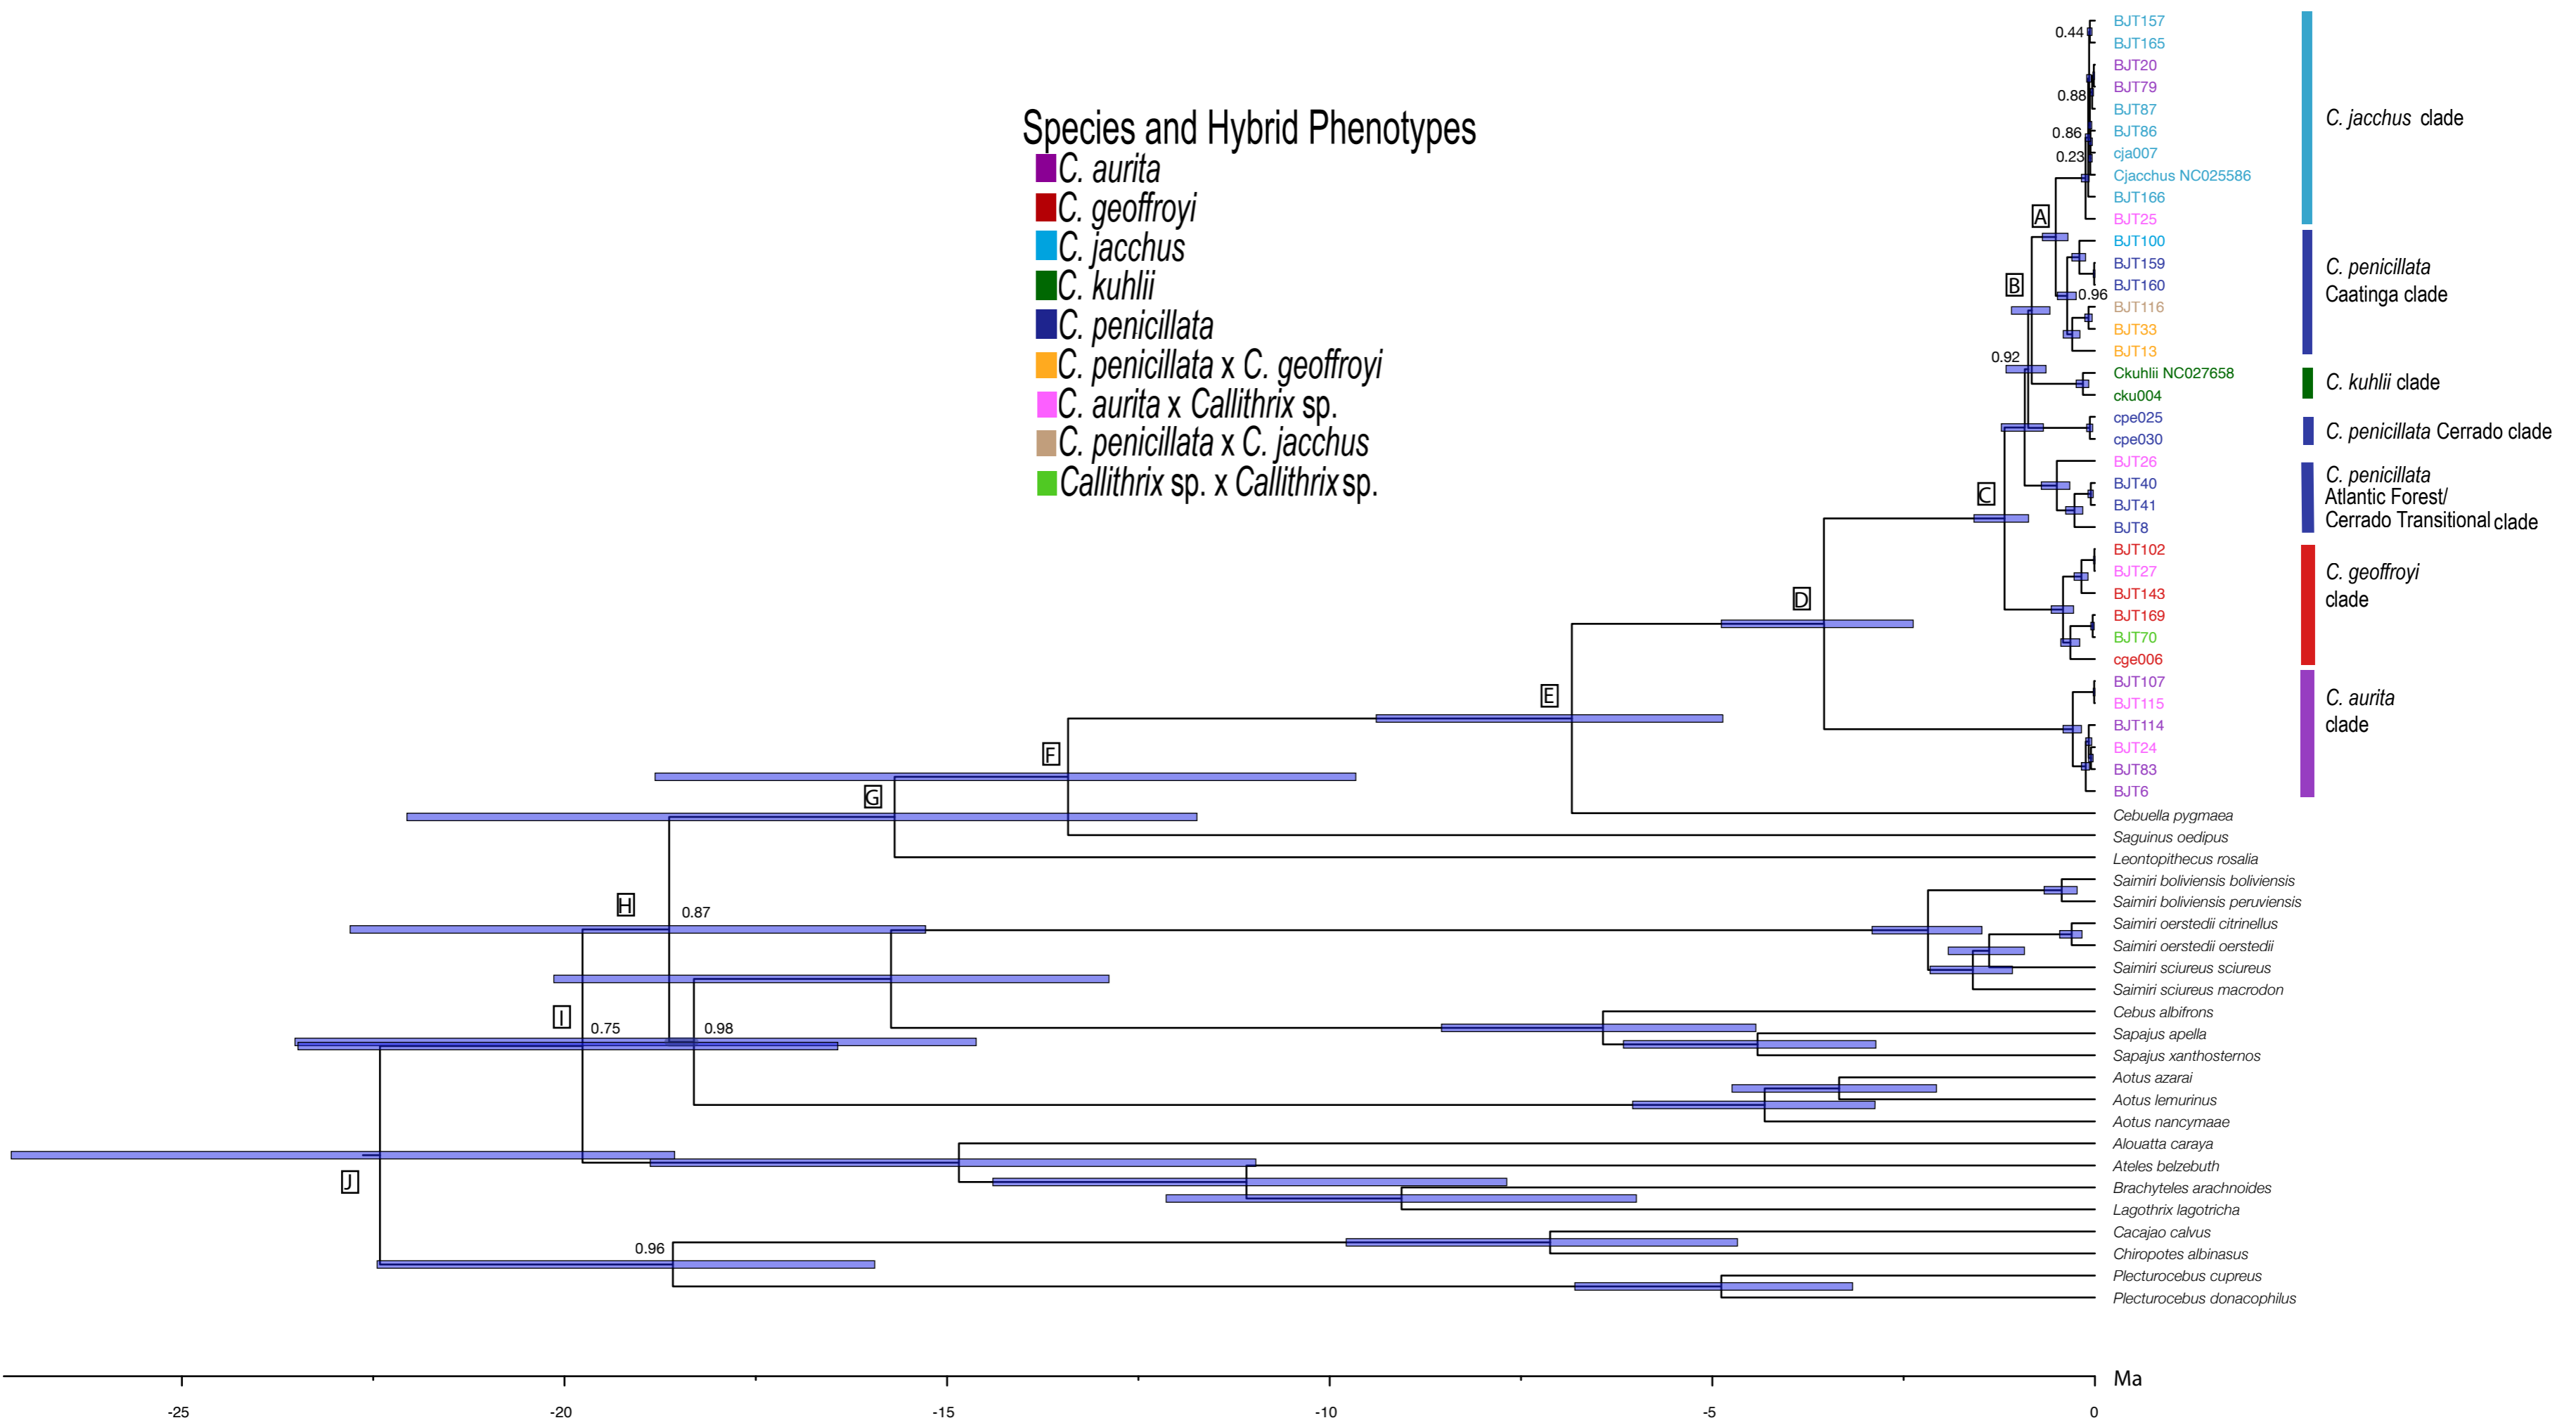

Supplement: Supplementary file 3 [file 27600728]
